# Supplementary material
Source: publisher site journal article supplement (http://kjim.org/upload/media/kjim-2020-694-suppl2.pdf)
Supplement: Supplementary file 1 [file kjim-2020-694-suppl2.pdf]

**Supplementary Table 2. Hazard ratio of antidiabetic agents for MACCEs**

| Variable                        | Univariate analysis   |         |
|---------------------------------|-----------------------|---------|
|                                 | Hazard ratio (95% CI) | p value |
| Metformin                       | 0.793 (0.592–1.061)   | 0.118   |
| Sulfonylurea                    | 1.049 (0.777–1.417)   | 0.755   |
| $\alpha$ -Glucosidase inhibitor | 0.892 (0.497–1.602)   | 0.702   |
| Thiazolidinedione               | 1.540 (0.572–4.152)   | 0.393   |
| DPP-4 inhibitor                 | 0.818 (0.550–1.216)   | 0.320   |
| SGLT2 inhibitor                 | 0.697 (0.259–1.879)   | 0.476   |
| Insulin                         | 1.132 (0.747–1.715)   | 0.558   |

MACCE, major adverse cardiovascular and cerebrovascular event; CI, confidence interval; DPP-4, dipeptidyl peptidase 4; SGLT2, sodium glucose co-transporter 2.
